# Supplementary material for: Using equitable impact sensitive tool (EQUIST) to promote implementation of evidence informed policymaking to improve maternal and child health outcomes: a focus on six West African Countries
Source: Springer Nature journal article supplement (doi:10.1186/s12992-018-0422-1), 2018-11-06
Supplement: MOESM2 [file 16255444]

**Additional File 2. Outcome of EQUISIT Scenario analysis for poorest quintile in Burkina Faso**

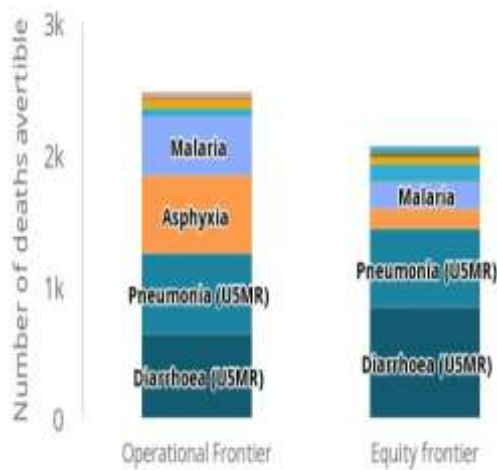

Fig 2a. Avertible under-five mortality by cause

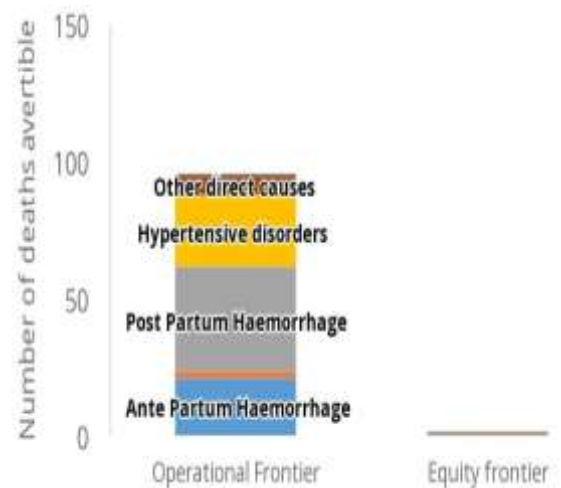

Fig 2b. Avertible maternal mortality by cause

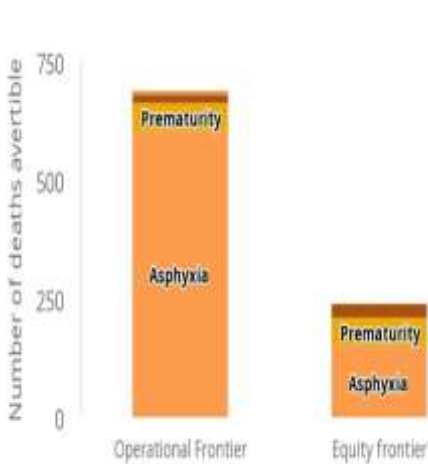

Fig 2c. Avertible neonatal mortality by cause

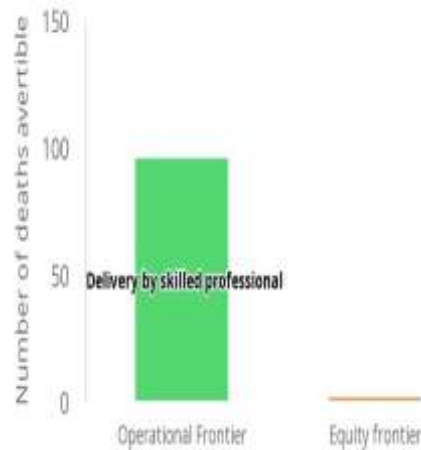

Fig 2d. Avertible maternal mortality by intervention package

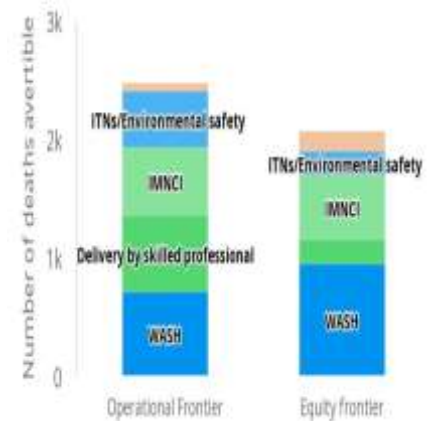

Fig 2e. Avertible under-five mortality by intervention package

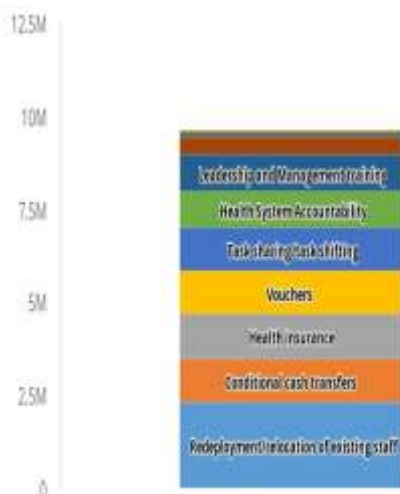

Fig 2f. Estimates of cost generation for the analysis

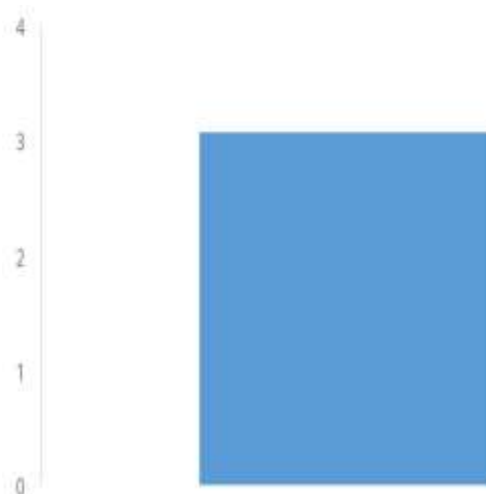

Fig 2g. Cost per capita of avertible number of deaths in the scenario
