# Supplementary material for: Using equitable impact sensitive tool (EQUIST) to promote implementation of evidence informed policymaking to improve maternal and child health outcomes: a focus on six West African Countries
Source: Springer Nature journal article supplement (doi:10.1186/s12992-018-0422-1), 2018-11-06
Supplement: MOESM3 [file 16255444]

**Additional File 3. Outcome of EQUISIT Scenario analysis for poorest quintile in Ghana**

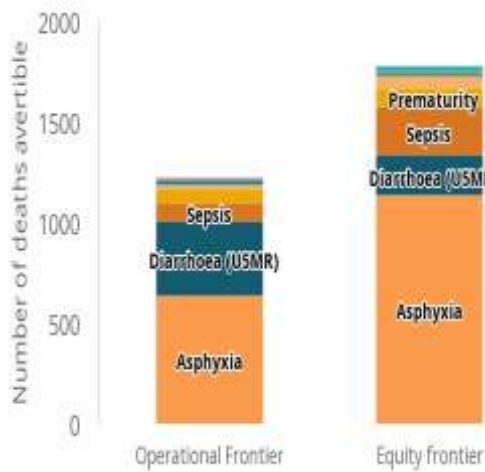

Fig 3a. Avertible under-five mortality by cause

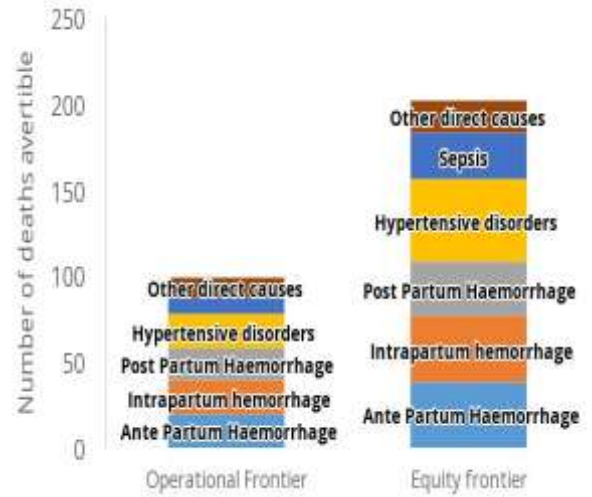

Fig 3b. Avertible maternal mortality by cause

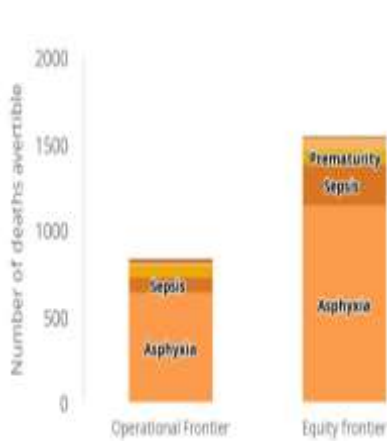

Fig 3c. Avertible neonatal mortality by cause

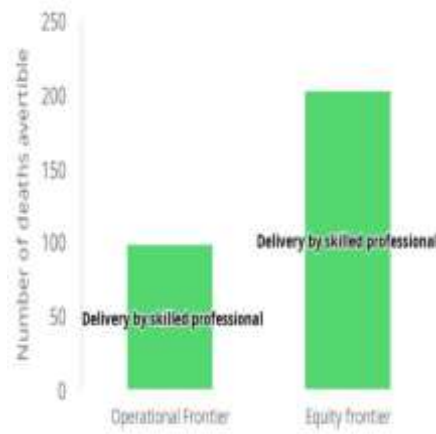

Fig 3d. Avertible maternal mortality by intervention package

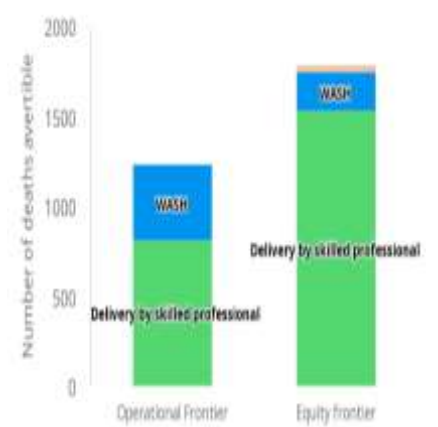

Fig 3e. Avertible under-five mortality by intervention package

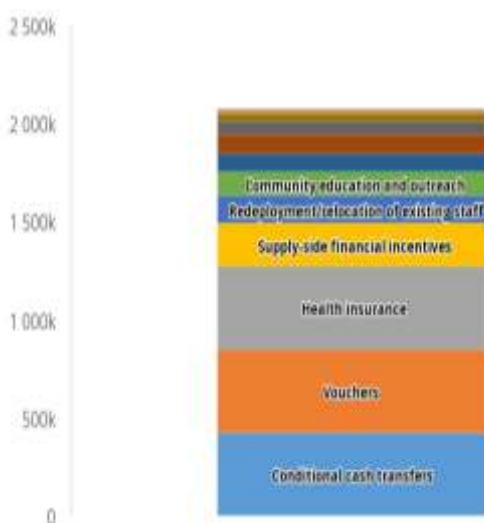

Fig 3f. Estimates of cost generation for the analysis

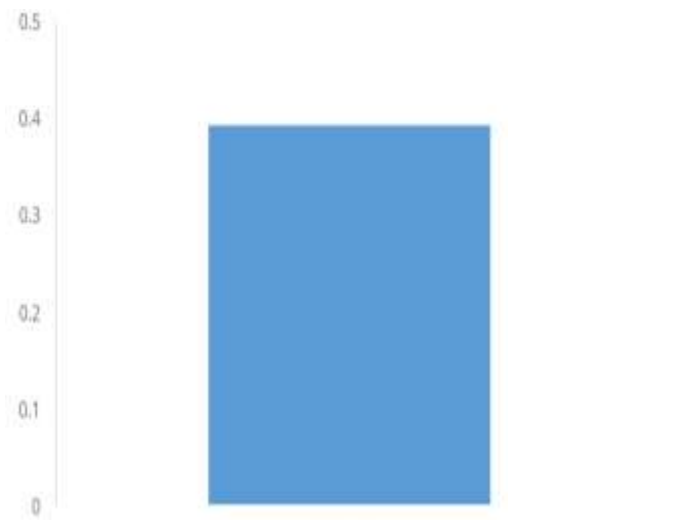

Fig 3g. Cost per capita of avertible number of deaths in the scenario
