# Supplementary material for: Using equitable impact sensitive tool (EQUIST) to promote implementation of evidence informed policymaking to improve maternal and child health outcomes: a focus on six West African Countries
Source: Springer Nature journal article supplement (doi:10.1186/s12992-018-0422-1), 2018-11-06
Supplement: MOESM5 [file 16255444]

**Additional File 5. Outcome of EQUISIT Scenario analysis for poorest quintile in Nigeria**

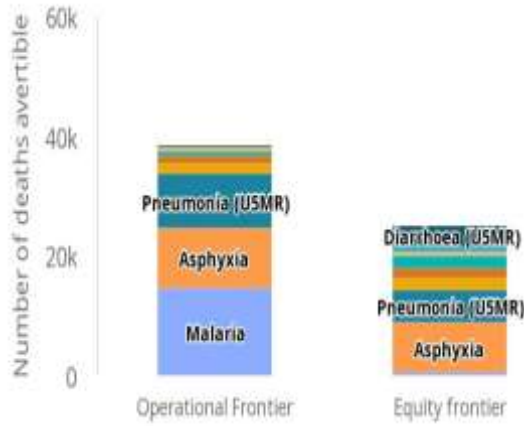

Fig 5a. Avertible under-five mortality by cause

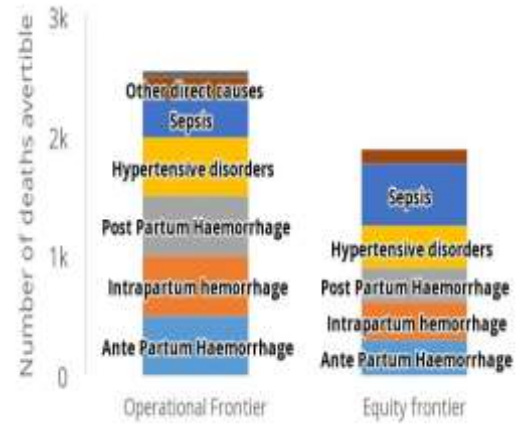

Fig 5b. Avertible maternal mortality by cause

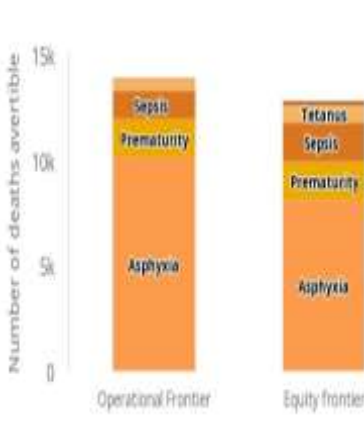

Fig 5c. Avertible neonatal mortality by cause

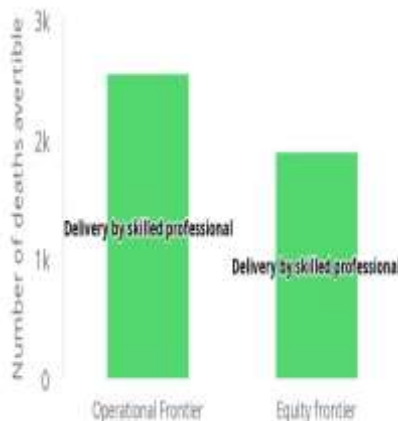

Fig 5d. Avertible maternal mortality by intervention package

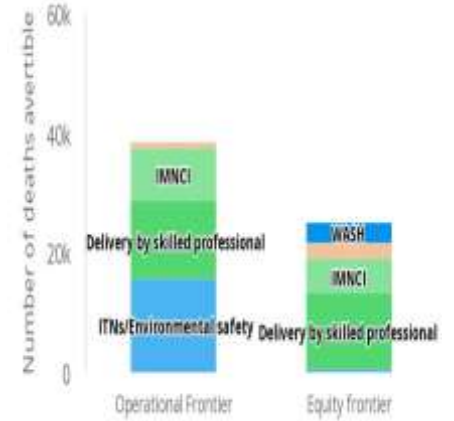

Fig 5e. Avertible under-five mortality by intervention package

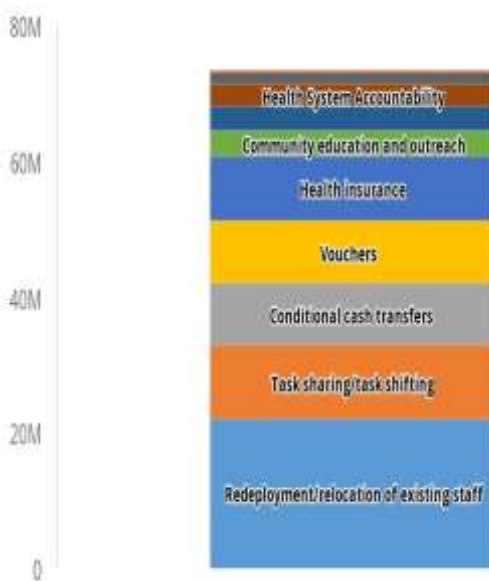

Fig 5f. Estimates of cost generation for the analysis

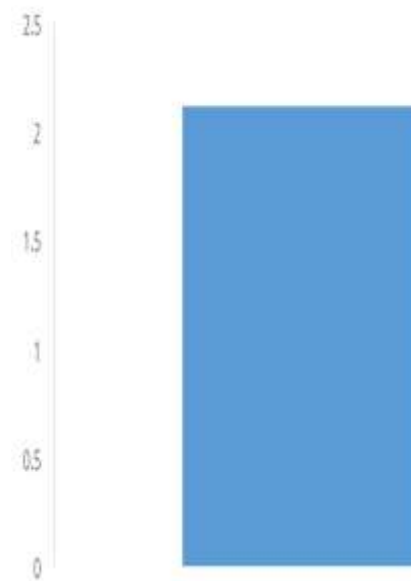

Fig 5g. Cost per capita of avertible number of deaths in the scenario
